# Supplementary material
Source: PubMed Central journal article supplement (PMC1462980)
Supplement: 7601090s1.pdf [file 7601090s1.pdf]

## Supplementary material

### RT-PCR Primers

H19 pro

For: 5' TGTGGATGCTGACTCTGTGG 3'

Rev: 5' GAGTCGTCACGTTTGTTCAGG3'

OripB

For: 5' TCG AGC ACC TCA CAT ACA CC 3'

Rev: 5' GAA CAG CGA TAT CTC CCA CC 3'

OriA

For: 5' TTG TCA CCA TTT TCG TCC TC 3'

Rev: 5' ATC CTA ATC TGT ATC CGG GT 3'

Kcnq1ot1

For: 5' GTG TGC TTT TCT CTG CAT GG 3'

Rev: 5' CAG GAC AAA CAC TGA GGA GG 3'

GAPDH

For: 5' CCTTCATTGACCTCAAC 3'

Rev: 5' AGTTGTCATGGATGACC 3'

### Primers for 3.2 kb *Kcnq1* sequence

For: 5' CAGTGGCTCCGTATTCGTTT 3'

Rev: 5' ATATGCGGCCGCGTCCCCTGCTTCTAACCACA 3'

### ChIP primers (Quantitative PCR)

*H19* promoter (H19p)

For: 5' CAGAAAAGGGACGGTGAGGA 3'

Rev: 5' TGAACAGCCTACGAGTGGCTAA 3'

Hygromycin promoter (HYGp)

For: 5' GGGAGATGCAATAGGTCAGG 3'

Rev: 5' TTCAGCTTCGATGTAGGAGG 3'

EBNA coding region (Ec)

For: 5' AGGTCGTGGACGTGGAGAAA 3'

Rev: 5' ACCATCTGGGCCACCTTCTT 3'

### H19 Coding region (H19c)

H19c1

For: 5' TCGCAGCAGAATGGCACATA 3'  
Rev: 3' GGCAACCCTGCACCTCTTCT 3'

H19c2

For: 5' TCTCTTCTGCCCCATGTGGT 3'  
Rev: 5' GAGCAGATTCTGAGGCAGGT 3'

### ChIP primers (semi-quantitative PCR)

*H19* promoter

For: 5' TGTGGATGCTGACTCTGTGG 3'  
Rev: 5' GAGTCGTCACGTTTGTTCAGG 3'

### Luciferase assays

The 570 bp fragment from the 3.6 kb *Kcnq1* ICR was PCR amplified using the following primers and the PCR fragment was cloned into KpnI and BglIII sites of PGL3-Basic (PGL3-Basic570)

For: 5' ATA TGG TAC CGT AAG ATA GCC CCA AGA CTT 3'  
Rev: 5' ATA TAG ATC TCG CAA GGA AAG CTG CGC AGA 3'

The 742 bp fragment from the 3.6 kb *Kcnq1* ICR was PCR amplified using the following primers and the PCR fragment was cloned into KpnI and BglIII sites of PGL3-Basic (PGL3-Basic742)

For: 5' ATA TGG TAC CGG ATT CCA TGG GAC AGC TGA 3'  
Rev: 5' ATA TAG ATC TAA TAT GCT GAG GCT GGT GGC 3'

PGL3-Basic CycB2 is similar to Cyclin B2 wt B2-Luci used in Lange-zu Dohna et al., 2000.
